# Supplementary material
Source: bioRxiv or medRxiv preprint supplement (https://www.biorxiv.org/highwire/filestream/125689/field_highwire_adjunct_files/7/416701-7.pdf)
Supplement: Supplementary file [file 416701-7.pdf]

| <b>Comp. (i)</b>   | <b>S0</b>                                | <b>S1</b>                        | <b>S2</b>                      | <b>S3</b>                     |                                                    |
|--------------------|------------------------------------------|----------------------------------|--------------------------------|-------------------------------|----------------------------------------------------|
| <b>Process (j)</b> | $S_O$ (gO <sub>2</sub> m <sup>-3</sup> ) | $S_{NO_2}$ (gN m <sup>-3</sup> ) | $S_{NH}$ (gN m <sup>-3</sup> ) | $S_C$ (gCOD m <sup>-3</sup> ) | Units of rates                                     |
| <b>P0</b>          | $1-1/Y_H$                                |                                  | $-i_{NX}$                      | $-1/Y_H$                      | gCOD <sub>XH</sub> m <sup>-3</sup> d <sup>-1</sup> |
| <b>P1</b>          | $f_{XI}-1$                               |                                  | $i_{NX}*(1-f_{XI})$            |                               | gCOD <sub>XH</sub> m <sup>-3</sup> d <sup>-1</sup> |
| <b>P2</b>          | $3.43*(i_{NX} -1/Y_A)$                   | $-i_{NX} +1/Y_A$                 | $-1/Y_A$                       |                               | gCOD <sub>XA</sub> m <sup>-3</sup> d <sup>-1</sup> |
| <b>P3</b>          | $f_{XI}-1$                               |                                  | $i_{NX}*(1-f_{XI})$            |                               | gCOD <sub>XA</sub> m <sup>-3</sup> d <sup>-1</sup> |
| <b>P4</b>          | $-1.14/Y_N$                              | $-1/Y_N$                         | $-i_{NX}$                      |                               | gCOD <sub>XN</sub> m <sup>-3</sup> d <sup>-1</sup> |
| <b>P5</b>          | $f_{XI}-1$                               |                                  | $i_{NX}*(1-f_{XI})$            |                               | gCOD <sub>XN</sub> m <sup>-3</sup> d <sup>-1</sup> |
